# Supplementary material for: Targeting anaplastic lymphoma kinase (ALK) gene alterations in neuroblastoma by using alkylating pyrrole-imidazole polyamides
Source: PubMed Central journal article supplement (PMC8483358; doi:10.1371/journal.pone.0257718), 2021-09-30

Fig 1E

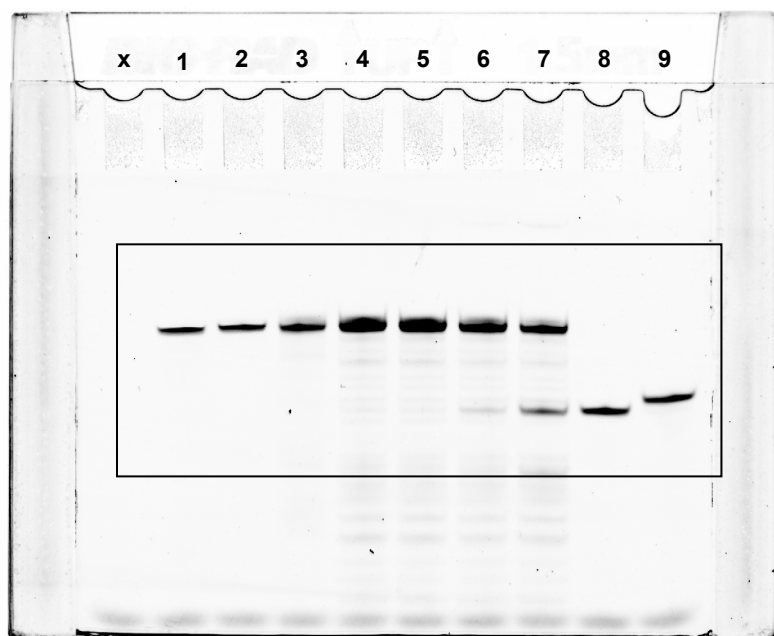

- 1: ODN1
- 2: ODN2
- 3: dsDNA
- 4: dsDNA + DMSO
- 5: dsDNA + 5.0  $\mu$ M Mismatch
- 6: dsDNA + 1.0  $\mu$ M CCC-003
- 7: dsDNA + 5.0  $\mu$ M CCC-003
- 8: ODN3 (15mer)
- 9: ODN4 (16mer)

**Fig 2A**

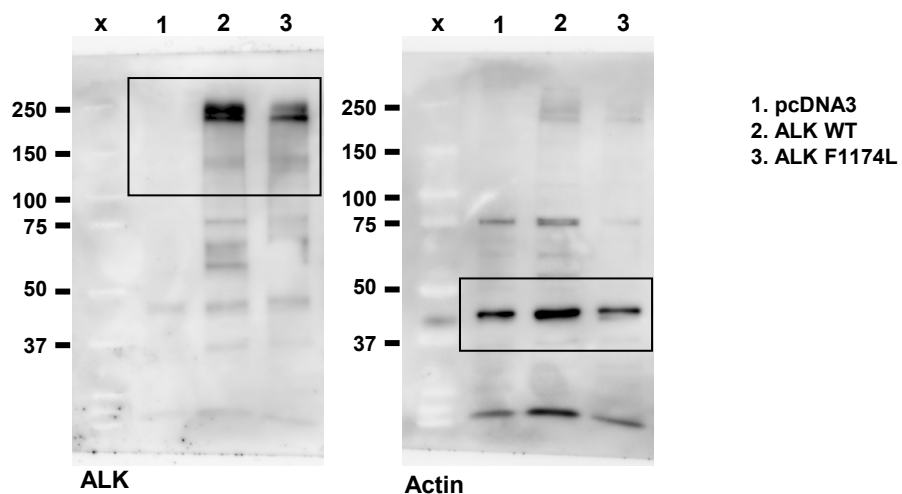

**Fig 2G**

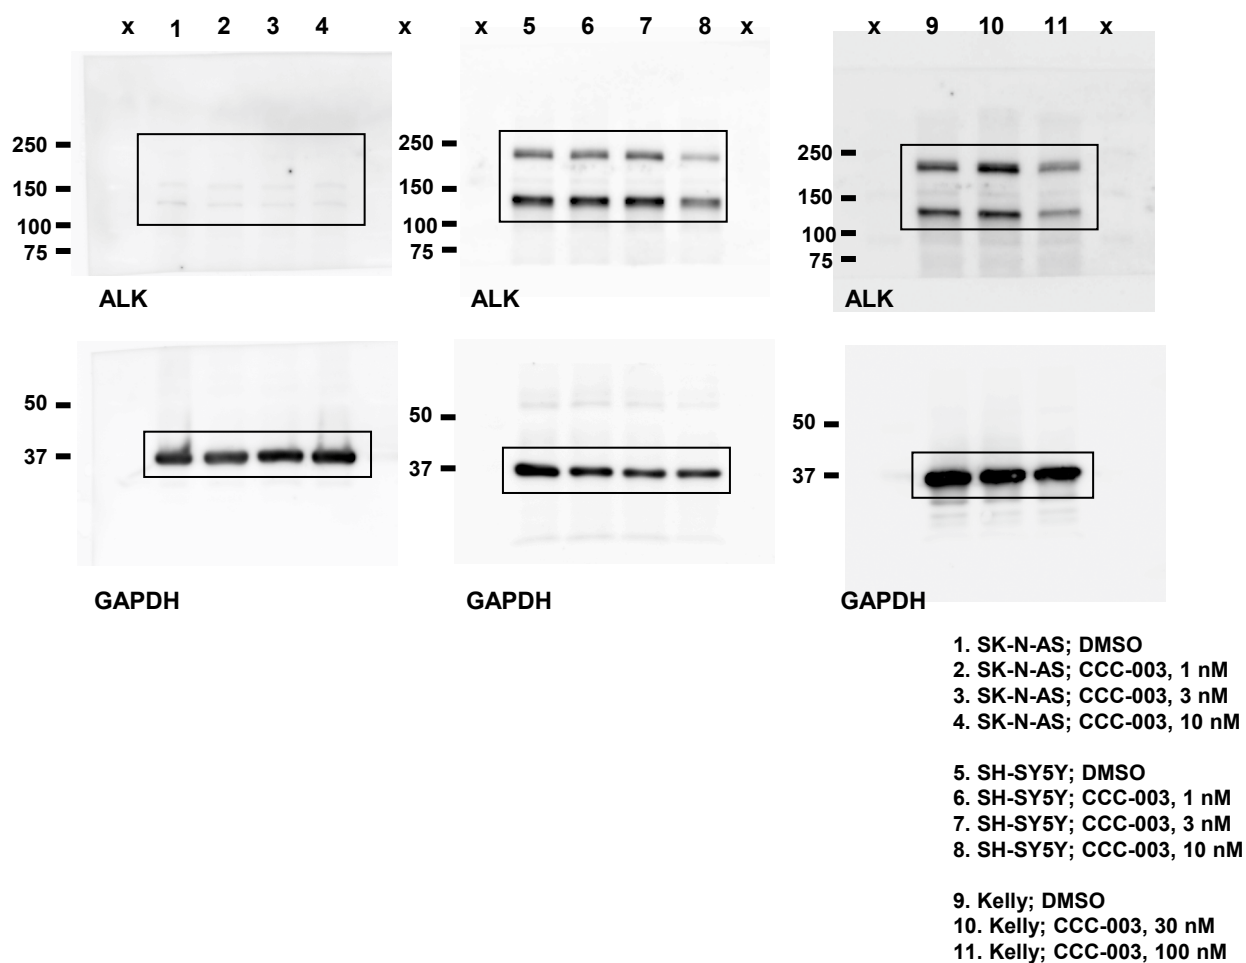

Fig 3E

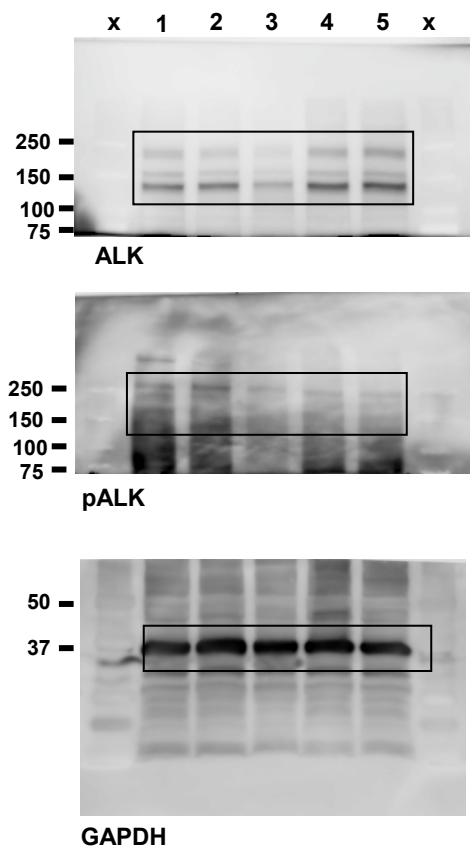

1. SH-SY5Y; DMSO
2. SH-SY5Y; CCC-003, 3 nM
3. SH-SY5Y; CCC-003, 10 nM
4. SH-SY5Y; Crizotinib, 100 nM
5. SH-SY5Y; Alectinib, 100 nM

Fig 4C

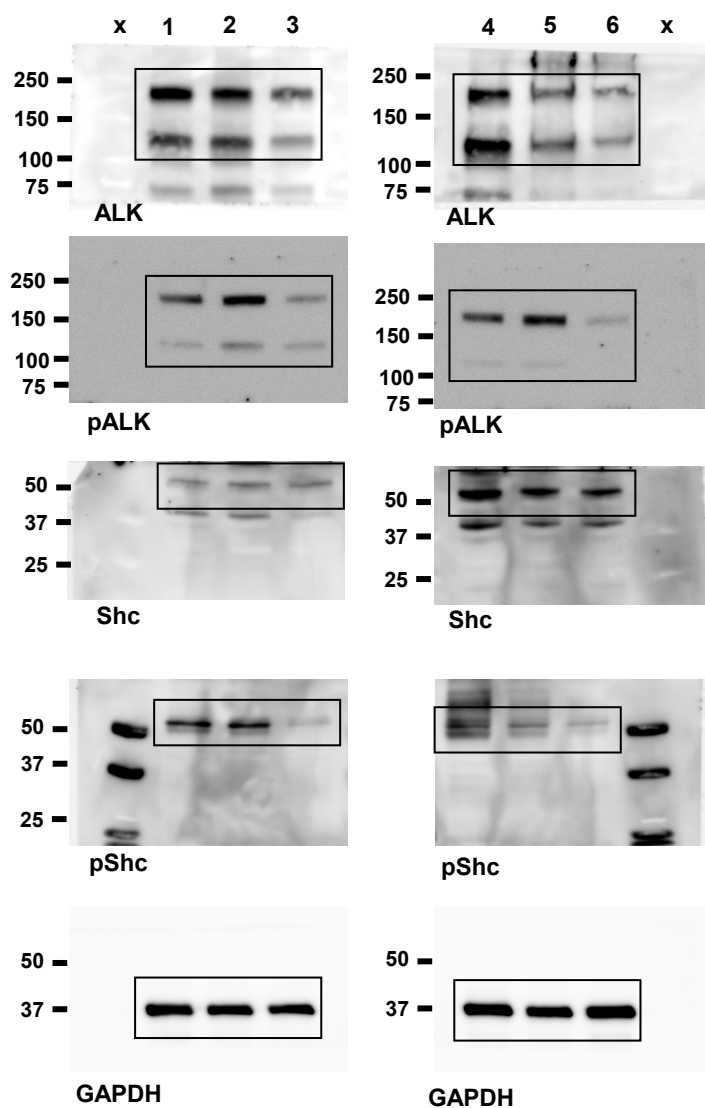

Fig 5C

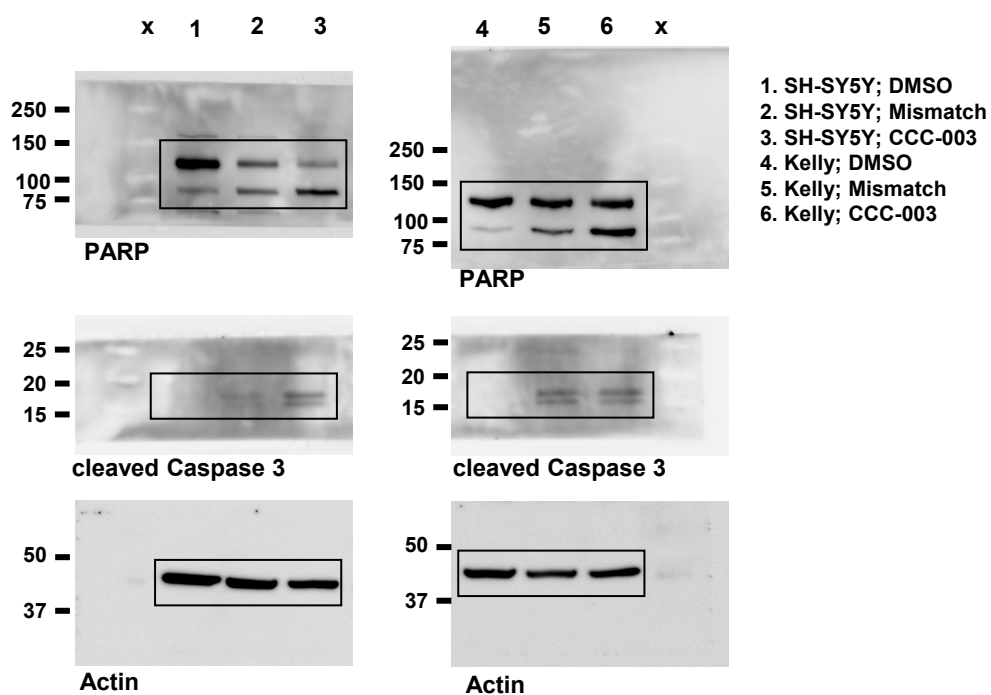

Supplement: pone.0257718.s009.pdf [file pone.0257718.s009.pdf]
